# Supplementary material for: HMGB1 overexpression as a prognostic factor for survival in cancer: a meta-analysis and systematic review
Source: PubMed Central journal article supplement (PMC5226592; doi:10.18632/oncotarget.10413), 2016-07-06
Supplement: oncotarget-07-50417-s001.pdf [file oncotarget-07-50417-s001.pdf]

## HMGB1 overexpression as a prognostic factor for survival in cancer: a meta-analysis and systematic review

### SUPPLEMENTARY TABLE

**Supplementary Table S1: Summary of evaluation standards of HMGB1 expression in included studies**

| Study            | Detection method | Definition of HMGB1 high/positive  | Definition of HMGB1 low/negative    | Evaluation standard of HMGB1 expression           |
|------------------|------------------|------------------------------------|-------------------------------------|---------------------------------------------------|
| Akaike et al     | IHC              | NA                                 | NA                                  | mean value of the counts of positive cancer cells |
| He et al         | IHC              | expression score $\geq 2$          | expression score $< 2$              | expression score (0-3)                            |
| Zhang et al      | IHC              | expression score $\geq 4$          | expression score $< 4$              | total expression score (0-12)                     |
| Yao et al        | IHC              | staining score $\geq 3$            | staining score $< 3$                | final staining score (0-7)                        |
| Peng et al       | IHC              | staining score $> 3$               | staining score $\leq 3$             | final staining score (0-7)                        |
| Soldevilla et al | qRT-PCR          | NA                                 | NA                                  | NA                                                |
| Ueda et al       | qRT-PCR          | NA                                 | NA                                  | median expression level in tumor tissues          |
| Liu et al        | IHC              | multiply-indexes $\geq 9$          | multiply-indexes $< 9$              | multiply-indexes (1-16)                           |
| Xiao et al       | IHC              | staining score $\geq 3$            | staining score $< 3$                | final staining score (0-7)                        |
| Chung et al      | ELISA            | serum level $> 30\text{ng/mL}$     | serum level $\leq 30\text{ng/mL}$   | serum HMGB1 level                                 |
| Wittwer et al    | ELISA            | serum level $> 2.4\text{ng/mL}$    | serum level $< 0.8\text{ng/mL}$     | serum HMGB1 level                                 |
| Wu et al         | IHC              | staining score $\geq 3$            | staining score $< 3$                | final staining score (0-7)                        |
| Liu et al        | IHC              | staining score $\geq 6$            | staining score $< 6$                | final staining score (0-7)                        |
| Chuangui et al   | IHC              | staining score $\geq 3$            | staining score $< 3$                | final staining score (0-7)                        |
| Tabata et al     | ELISA            | serum level $\geq 9.0\text{ng/mL}$ | serum level $< 9.0\text{ng/mL}$     | serum HMGB1 level                                 |
| Yang et al       | IHC              | staining score $> 3$               | staining score $\leq 3$             | final staining score (0-7)                        |
| Li et al         | IHC              | staining score $\geq 3$            | staining score $< 3$                | final staining score (0-7)                        |
| Sheng et al      | ELISA            | serum level $> 21.8\text{ng/mL}$   | serum level $\leq 21.8\text{ng/mL}$ | serum HMGB1 level                                 |

IHC: immunohistochemistry; qRT-PCR: quantitative real-time polymerase chain reaction; ELISA: enzyme-linked immunosorbent assay; HMGB1: high-mobility group box 1
